# Supplementary material for: First Report of Microcystis Strains Producing MC-FR and -WR Toxins in Japan
Source: MDPI journal article supplement (doi:10.3390/toxins11090521), 2019-09-09
Supplement: s1 [file s1]

# Supplementary Materials: First Report of *Microcystis* Strains Producing MC-FR and -WR Toxins in Japan

Tsuyoshi Ikehara, Kyoko Kuniyoshi, Haruyo Yamaguchi, Yuuhiko Tanabe, Tomoharu Sano, Masahiro Yoshimoto, Naomasa Oshiro, Shihoko Nakashima and Mina Yasumoto-Hirose

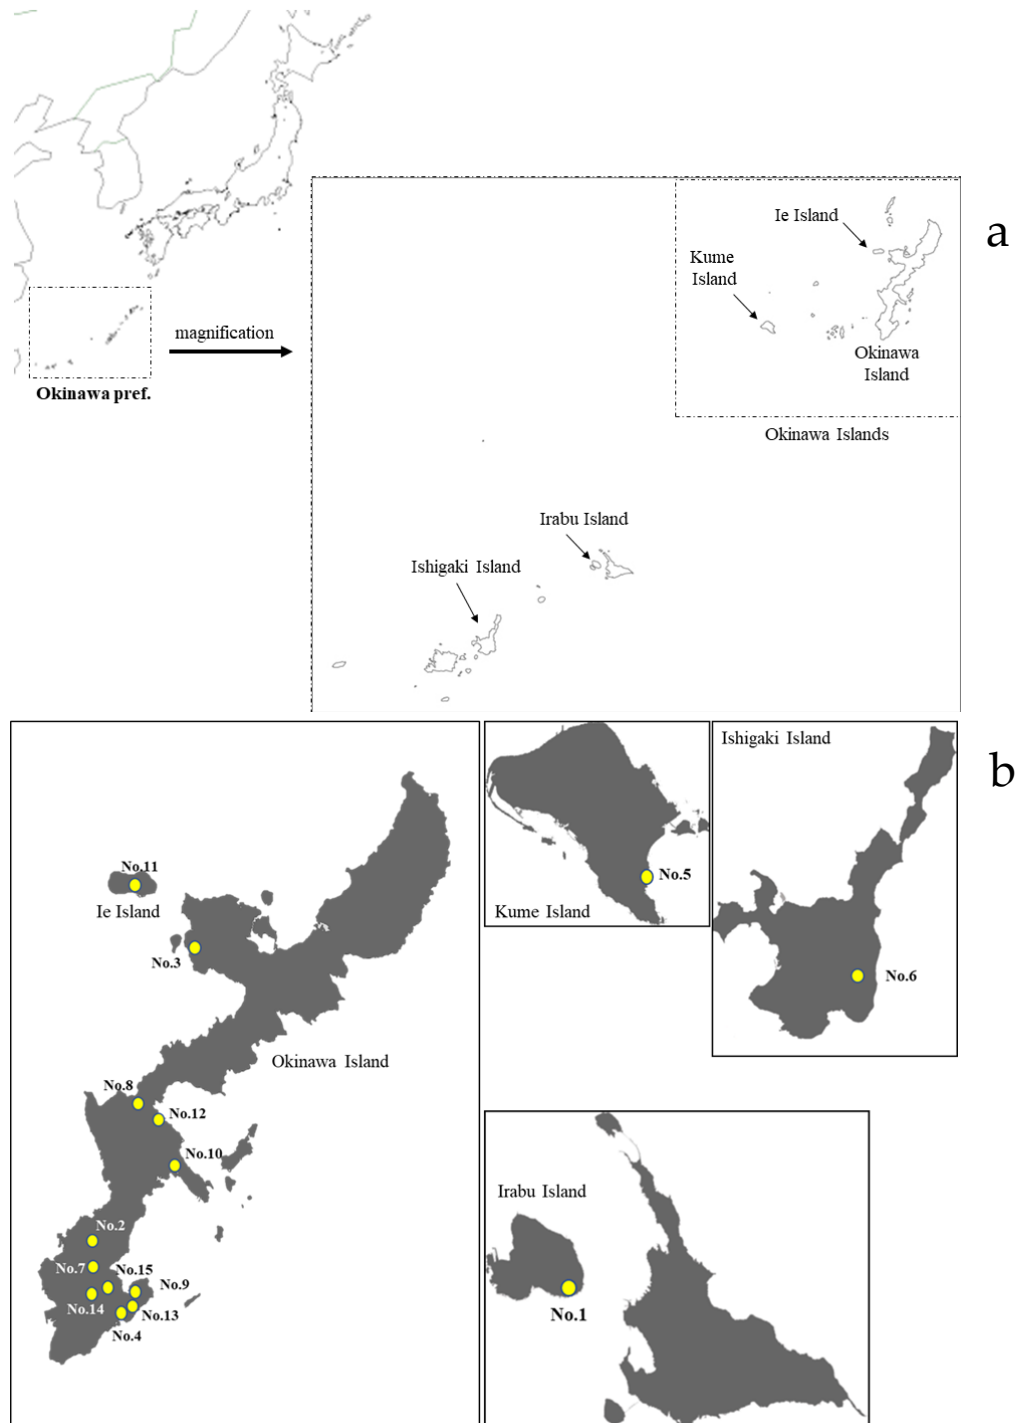

**Figure 1.** (a) Location of Okinawa prefecture and (b) collection sites of water sample.

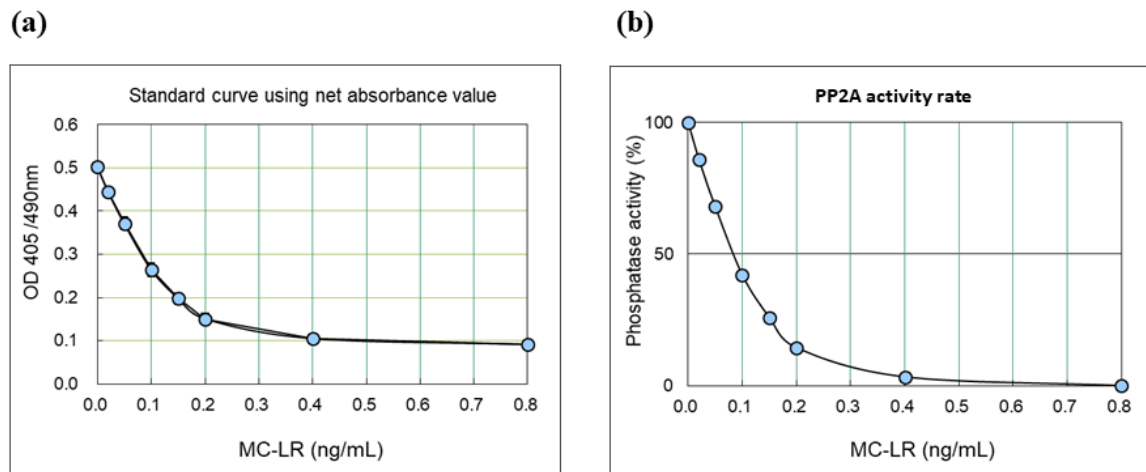

**Figure 2.** PP2A activity rate and calibration curve using net absorbance value obtained by the PP2A assay with MC-LR standard solution.
