# Supplementary figures and images for: First Report of Microcystis Strains Producing MC-FR and -WR Toxins in Japan
Source: MDPI journal article supplement (doi:10.3390/toxins11090521), 2019-09-09

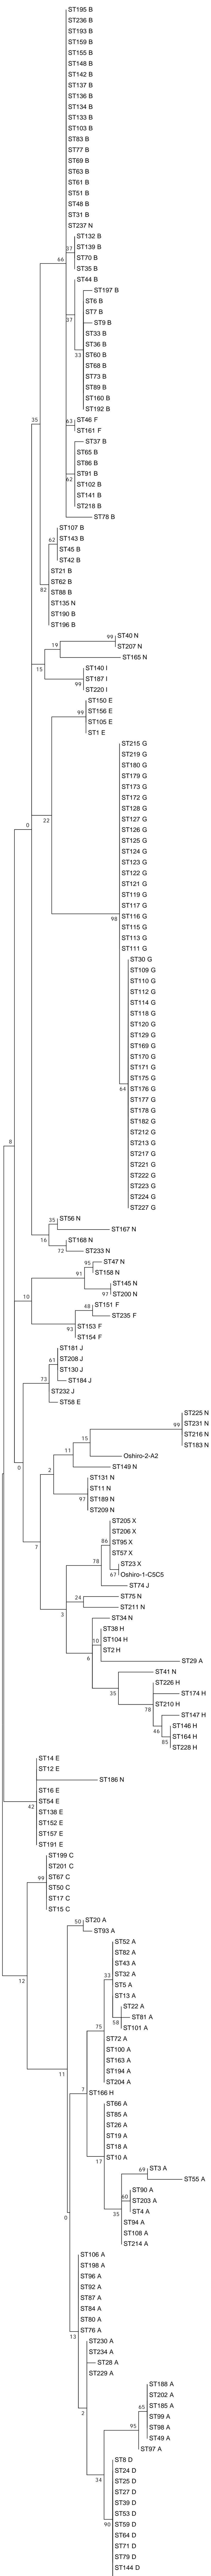

Supplement: s1 [file s1]
